# Supplementary material for: Benefits of Antimicrobial Photodynamic Therapy as an Adjunct to Non-Surgical Periodontal Treatment in Smokers with Periodontitis: A Systematic Review and Meta-Analysis
Source: MDPI journal article supplement (doi:10.3390/medicina59040684), 2023-03-30
Supplement: s1 [file s1]

Table S3. Type of periodontal disease and definition; interventions and follow-up; criteria for smoking/ years smoking; periodontal parameters, main results in periodontal parameters

| Study and year of publication | Type of periodontitis and Definition                                                                                                            | Interventions and Follow-up                                 | criteria for smoking/ years of smoking            | Periodontal parameters                                                                                                                                        |                                                                                                                                                             |                                                                                                                                                                |                                                                                                                                                               |
|-------------------------------|-------------------------------------------------------------------------------------------------------------------------------------------------|-------------------------------------------------------------|---------------------------------------------------|---------------------------------------------------------------------------------------------------------------------------------------------------------------|-------------------------------------------------------------------------------------------------------------------------------------------------------------|----------------------------------------------------------------------------------------------------------------------------------------------------------------|---------------------------------------------------------------------------------------------------------------------------------------------------------------|
|                               |                                                                                                                                                 |                                                             |                                                   | Probing depth (PD mm)                                                                                                                                         | Clinical Attachment level (CAL mm)                                                                                                                          | Bleeding on Probing (BOP%)                                                                                                                                     | Plaque index (PI%)                                                                                                                                            |
| Al- Kheraif et al. 2022 [26]  | Stage- III Generalized chronic periodontitis<br><br>PPD $\geq$ 6 mm, CAL $\geq$ 5 mm, and MBL in contralateral teeth, tooth loss $\leq$ 4 teeth | <b>Group NS</b><br>CAP/ aPDT+RSD                            | Smokers $\geq$ 10 cigarettes per day for 5 years. | <b>Group NS</b><br><b>CAP/aPDT+RSD</b><br><b>Baseline</b><br>6.12 $\pm$ 0.23<br><b>3 months</b><br>4.67 $\pm$ 0.21*†<br><b>6 months</b><br>2.94 $\pm$ 0.89*   | <b>Group NS</b><br><b>CAP/aPDT+RSD</b><br><b>Baseline</b><br>5.22 $\pm$ 1.14<br><b>3 months</b><br>4.18 $\pm$ 0.88*†<br><b>6 months</b><br>4.03 $\pm$ 0.49* | <b>Group NS</b><br><b>CAP/aPDT+RSD</b><br><b>Baseline</b><br>54.23 $\pm$ 18.24<br><b>3 months</b><br>19.52 $\pm$ 4.70*<br><b>6 months</b><br>16.91 $\pm$ 3.21* | <b>Group NS</b><br><b>CAP/aPDT+RSD</b><br><b>Baseline</b><br>35.72 $\pm$ 5.21<br><b>3 months</b><br>12.34 $\pm$ 4.42*<br><b>6 months</b><br>10.45 $\pm$ 2.21* |
|                               |                                                                                                                                                 | RSD alone                                                   |                                                   |                                                                                                                                                               |                                                                                                                                                             |                                                                                                                                                                |                                                                                                                                                               |
|                               |                                                                                                                                                 | <b>Group CS</b><br>CAP/aPDT+RSD                             |                                                   |                                                                                                                                                               |                                                                                                                                                             |                                                                                                                                                                |                                                                                                                                                               |
|                               |                                                                                                                                                 | RSD alone                                                   |                                                   | <b>RSD alone</b><br><b>Baseline</b><br>6.21 $\pm$ 0.71<br><b>3 months</b><br>4.41 $\pm$ 0.53*†<br><b>6 months</b><br>3.43 $\pm$ 0.41*                         | <b>RSD alone</b><br><b>Baseline</b><br>5.56 $\pm$ 1.03<br><b>3 months</b><br>4.72 $\pm$ 0.95*†<br><b>6 months</b><br>4.59 $\pm$ 0.74*                       | <b>RSD alone</b><br><b>Baseline</b><br>57.25 $\pm$ 16.37<br><b>3 months</b><br>23.35 $\pm$ 9.42*<br><b>6 months</b><br>20.89 $\pm$ 8.31*                       | <b>RSD alone</b><br><b>Baseline</b><br>39.32 $\pm$ 9.21<br><b>3 months</b><br>14.25 $\pm$ 3.12*<br><b>6 months</b><br>11.20 $\pm$ 2.54*                       |
|                               |                                                                                                                                                 | <b>Follow-up:</b><br>Baseline,<br>3 months, and<br>6 months |                                                   |                                                                                                                                                               |                                                                                                                                                             |                                                                                                                                                                |                                                                                                                                                               |
|                               |                                                                                                                                                 |                                                             |                                                   | <b>Group CS</b><br><b>CAP/ aPDT+RSD</b><br><b>Baseline</b><br>6.34 $\pm$ 0.71<br><b>3 months</b><br>4.78 $\pm$ 0.79*†<br><b>6 months</b><br>3.54 $\pm$ 0.53*† | <b>Group CS</b><br><b>CAP/aPDT+RSD</b><br><b>Baseline</b><br>7.45 $\pm$ 1.25<br><b>3 months</b><br>6.72 $\pm$ 0.47*<br><b>6 months</b><br>6.16 $\pm$ 0.34*  | <b>Group CS</b><br><b>CAP/aPDT+RSD</b><br><b>Baseline</b><br>40.32 $\pm$ 7.94<br><b>3 months</b><br>27.45 $\pm$ 6.25<br><b>6 months</b><br>18.71 $\pm$ 5.32*   | <b>Group CS</b><br><b>CAP/aPDT+RSD</b><br><b>Baseline</b><br>41.15 $\pm$ 9.23<br><b>3 months</b><br>12.21 $\pm$ 3.42*<br><b>6 months</b><br>14.56 $\pm$ 2.37* |
|                               |                                                                                                                                                 |                                                             |                                                   | <b>RSD alone</b><br><b>Baseline</b><br>6.43 $\pm$ 0.51<br><b>3 months</b><br>5.78 $\pm$ 0.74†<br><b>6 months</b><br>4.49 $\pm$ 0.42*†                         | <b>RSD alone</b><br><b>Baseline</b><br>7.32 $\pm$ 1.41<br><b>3 months</b><br>6.81 $\pm$ 0.79*<br><b>6 months</b><br>6.52 $\pm$ 0.35*                        | <b>RSD alone</b><br><b>Baseline</b><br>35.41 $\pm$ 6.82<br><b>3 months</b><br>24.19 $\pm$ 7.92<br><b>6 months</b><br>25.45 $\pm$ 7.21                          | <b>RSD alone</b><br><b>Baseline</b><br>42.14 $\pm$ 10.12<br><b>3 months</b><br>16.36 $\pm$ 6.12<br><b>6 months</b><br>19.41 $\pm$ 7.23                        |
|                               |                                                                                                                                                 |                                                             |                                                   |                                                                                                                                                               |                                                                                                                                                             |                                                                                                                                                                |                                                                                                                                                               |
|                               |                                                                                                                                                 |                                                             |                                                   |                                                                                                                                                               |                                                                                                                                                             |                                                                                                                                                                |                                                                                                                                                               |
|                               |                                                                                                                                                 |                                                             |                                                   |                                                                                                                                                               |                                                                                                                                                             |                                                                                                                                                                |                                                                                                                                                               |
|                               |                                                                                                                                                 |                                                             |                                                   |                                                                                                                                                               |                                                                                                                                                             |                                                                                                                                                                |                                                                                                                                                               |
|                               |                                                                                                                                                 |                                                             |                                                   |                                                                                                                                                               |                                                                                                                                                             |                                                                                                                                                                |                                                                                                                                                               |

|                                    |                                                                                                                                                                          |                                                                                                                                                                              |                                                                     |                                                                                                                                                                                                                                                                                                                                                                                                                                                                                                                                                                            |                                                                                                                                                                                                                                                                                                                                                                                                                                                                                                                                                                           |                                                                                                                                                                                                                                                                                                                                                                                                                                                                                                                                                                                    |                                                                                                                                                                                                                                                                                                                                                                                                                                                                                                                                                                                       |
|------------------------------------|--------------------------------------------------------------------------------------------------------------------------------------------------------------------------|------------------------------------------------------------------------------------------------------------------------------------------------------------------------------|---------------------------------------------------------------------|----------------------------------------------------------------------------------------------------------------------------------------------------------------------------------------------------------------------------------------------------------------------------------------------------------------------------------------------------------------------------------------------------------------------------------------------------------------------------------------------------------------------------------------------------------------------------|---------------------------------------------------------------------------------------------------------------------------------------------------------------------------------------------------------------------------------------------------------------------------------------------------------------------------------------------------------------------------------------------------------------------------------------------------------------------------------------------------------------------------------------------------------------------------|------------------------------------------------------------------------------------------------------------------------------------------------------------------------------------------------------------------------------------------------------------------------------------------------------------------------------------------------------------------------------------------------------------------------------------------------------------------------------------------------------------------------------------------------------------------------------------|---------------------------------------------------------------------------------------------------------------------------------------------------------------------------------------------------------------------------------------------------------------------------------------------------------------------------------------------------------------------------------------------------------------------------------------------------------------------------------------------------------------------------------------------------------------------------------------|
| Al- Kheraif<br>et al. 2022<br>[25] | <p>Stage- II<br/>Generalized<br/>chronic<br/>periodontitis</p> <p>PD ≥ 5 mm, CAL<br/>of 3– 4 mm and<br/>horizontal alveolar<br/>bone loss in<br/>contralateral teeth</p> | <p><b>Group NS</b><br/>CAP/PDT+DS<br/>DS alone</p> <p><b>Group CS</b><br/>CAP/PDT+DS<br/>DS alone</p> <p><b>Follow-up:</b><br/>Baseline,<br/>3 months, and<br/>6 months</p>  | Smokers<br>≥10<br>cigarettes<br>per day for<br>at least 5<br>years. | <p><b>Group NS</b><br/><b>CAP/PDT+DS</b><br/><b>Baseline</b><br/>4.64±0.55<br/><b>3 months</b><br/>3.12±0.28*†<br/><b>6 months</b><br/>2.89±0.21*</p> <p><b>DS alone</b><br/><b>Baseline</b><br/>4.72±0.69<br/><b>3 months</b><br/>3.68±0.45*†<br/><b>6 months</b><br/>3.03±0.38*</p> <p><b>Group CS</b><br/><b>CAP/PDT+DS</b><br/><b>Baseline</b><br/>4.59±0.83<br/><b>3 months</b><br/>3.28±0.61*<br/><b>6 months</b><br/>2.97±0.43*†</p> <p><b>DS alone</b><br/><b>Baseline</b><br/>4.51±0.77<br/><b>3 months</b><br/>3.92±0.63<br/><b>6 months</b><br/>3.76±0.49*†</p> | <p><b>Group NS</b><br/><b>CAP/PDT+DS</b><br/><b>Baseline</b><br/>5.22±1.14<br/><b>3 months</b><br/>4.18±0.88*†<br/><b>6 months</b><br/>4.03±0.49*</p> <p><b>DS alone</b><br/><b>Baseline</b><br/>5.56±1.03<br/><b>3 months</b><br/>4.72±0.95*†<br/><b>6 months</b><br/>4.59±0.74*</p> <p><b>Group CS</b><br/><b>CAP/PDT+DS</b><br/><b>Baseline</b><br/>5.83±1.25<br/><b>3 months</b><br/>4.67±0.82*<br/><b>6 months</b><br/>4.16±0.44*</p> <p><b>DS alone</b><br/><b>Baseline</b><br/>5.46±1.41<br/><b>3 months</b><br/>4.91±0.76*<br/><b>6 months</b><br/>4.62±0.65*</p> | <p><b>Group NS</b><br/><b>CAP/PDT+DS</b><br/><b>Baseline</b><br/>52.68±20.04<br/><b>3 months</b><br/>17.46±4.71*<br/><b>6 months</b><br/>14.87±2.90*</p> <p><b>DS alone</b><br/><b>Baseline</b><br/>55.27±18.23<br/><b>3 months</b><br/>21.52±7.32*<br/><b>6 months</b><br/>18.69±6.51*</p> <p><b>Group CS</b><br/><b>CAP/PDT+DS</b><br/><b>Baseline</b><br/>38.71±6.82<br/><b>3 months</b><br/>25.42±5.81<br/><b>6 months</b><br/>16.59±4.93*</p> <p><b>DS alone</b><br/><b>Baseline</b><br/>34.62±7.99<br/><b>3 months</b><br/>23.27±8.10<br/><b>6 months</b><br/>24.66±7.46</p> | <p><b>Group NS</b><br/><b>CAP/PDT+DS</b><br/><b>Baseline</b><br/>34.61±8.63<br/><b>3 months</b><br/>11.82±3.46*<br/><b>6 months</b><br/>9.71±2.66*</p> <p><b>DS alone</b><br/><b>Baseline</b><br/>38.45±10.34<br/><b>3 months</b><br/>13.82±4.01*<br/><b>6 months</b><br/>10.15±4.60*</p> <p><b>Group CS</b><br/><b>CAP/PDT+DS</b><br/><b>Baseline</b><br/>39.08±11.67<br/><b>3 months</b><br/>12.28±5.03*<br/><b>6 months</b><br/>14.72±6.66*</p> <p><b>DS alone</b><br/><b>Baseline</b><br/>40.04±13.63<br/><b>3 months</b><br/>14.78±6.54*<br/><b>6 months</b><br/>17.83±8.09*</p> |
| AlAhmari<br>et al. 2019<br>[24]    | <p>Generalized<br/>chronic<br/>periodontitis</p> <p>Presence of at<br/>least 30% of sites<br/>with CAL ≥ 3 mm<br/>and PD &gt;3 mm</p>                                    | <p><b>Group 1 CS</b><br/>SRP alone<br/>SRP+aPDT</p> <p><b>Group 2 NS</b><br/>SRP alone<br/>SRP+aPDT</p> <p><b>Follow-up:</b><br/>Baseline,<br/>1 month, and<br/>3 months</p> | Mean<br>history of<br>cigarette<br>smoking of<br>12.5 years         | <p><b>Group 1 CS</b><br/><b>SRP alone</b><br/><b>Baseline</b><br/>6.1 ± 0.5<br/><b>1 month</b><br/>5.4 ± 1.1<br/><b>3 months</b><br/>5.5 ± 1.2</p> <p><b>SRP+aPDT</b><br/><b>Baseline</b><br/>6.4 ± 0.8<br/><b>1 month</b><br/>5.7 ± 0.4<br/><b>3 months</b><br/>5.8 ± 1.1</p>                                                                                                                                                                                                                                                                                             | <p><b>Group 1 CS</b><br/><b>SRP alone</b><br/><b>Baseline</b><br/>7.1 ± 0.7<br/><b>1 month</b><br/>6.3 ± 0.6<br/><b>3 months</b><br/>6 ± 0.4</p> <p><b>SRP+aPDT</b><br/><b>Baseline</b><br/>7.4 ± 0.7<br/><b>1 month</b><br/>6.4 ± 0.9<br/><b>3 months</b><br/>6.2 ± 0.5</p>                                                                                                                                                                                                                                                                                              | <p><b>Group 1 CS</b><br/><b>SRP alone</b><br/><b>Baseline</b><br/>35.3 ± 6.9<br/><b>1 month</b><br/>30.6 ± 6.4<br/><b>3 months</b><br/>32.7 ± 2.4</p> <p><b>SRP+aPDT</b><br/><b>Baseline</b><br/>31.6 ± 4.5<br/><b>1 month</b><br/>28.7 ± 2.8<br/><b>3 months</b><br/>28.2 ± 1.6</p>                                                                                                                                                                                                                                                                                               | <p><b>Group 1 CS</b><br/><b>SRP alone</b><br/><b>Baseline</b><br/>52.6 ± 9.3<br/><b>1 month</b><br/>34.9 ± 8.4<br/><b>3 months</b><br/>38.5 ± 5.6</p> <p><b>SRP+aPDT</b><br/><b>Baseline</b><br/>55.2 ± 5.6<br/><b>1 month</b><br/>30.3 ± 5.1<br/><b>3 months</b><br/>35.2 ± 3.9</p>                                                                                                                                                                                                                                                                                                  |

|                                   |                                                                                                                          |                                                                                                                         |                                                 |                                                                                                                                                                                                                                                                                                                                                                                                                                                                                                        |                                                                                                                                                                                                                                                                                                                                                                                                                                                                                                            |                                                                                                                                                                                                                                        |                                                                                                                                                                                                                                        |
|-----------------------------------|--------------------------------------------------------------------------------------------------------------------------|-------------------------------------------------------------------------------------------------------------------------|-------------------------------------------------|--------------------------------------------------------------------------------------------------------------------------------------------------------------------------------------------------------------------------------------------------------------------------------------------------------------------------------------------------------------------------------------------------------------------------------------------------------------------------------------------------------|------------------------------------------------------------------------------------------------------------------------------------------------------------------------------------------------------------------------------------------------------------------------------------------------------------------------------------------------------------------------------------------------------------------------------------------------------------------------------------------------------------|----------------------------------------------------------------------------------------------------------------------------------------------------------------------------------------------------------------------------------------|----------------------------------------------------------------------------------------------------------------------------------------------------------------------------------------------------------------------------------------|
|                                   |                                                                                                                          |                                                                                                                         |                                                 | <b>Group 2 NS SRP alone</b><br><b>Baseline</b><br>6.6 ± 0.4<br><b>1 month</b><br>4.4 ± 0.8<br><b>3 months</b><br>4.1 ± 0.5<br><b>SRP+aPDT</b><br><b>Baseline</b><br>6.4 ± 0.5<br><b>1 month</b><br>4.6 ± 1.1<br><b>3 months</b><br>4.2 ± 0.8                                                                                                                                                                                                                                                           | <b>Group 2 NS SRP alone</b><br><b>Baseline</b><br>7.2 ± 0.5<br><b>1 month</b><br>5.2 ± 0.3<br><b>3 months</b><br>4.9 ± 0.6<br><b>SRP+aPDT</b><br><b>Baseline</b><br>7.1 ± 0.3<br><b>1 month</b><br>5 ± 0.6<br><b>3 months</b><br>5.2 ± 0.4                                                                                                                                                                                                                                                                 | <b>Group 2 NS SRP alone</b><br><b>Baseline</b><br>61.2±9.6<br><b>1 month</b><br>17.3±4.5<br><b>3 months</b><br>20.3±4.7<br><b>SRP+aPDT</b><br><b>Baseline</b><br>65.4±6.6<br><b>1 month</b><br>19.4±8.1<br><b>3 months</b><br>21.6±5.4 | <b>Group 2 NS SRP alone</b><br><b>Baseline</b><br>57.3±8.4<br><b>1 month</b><br>20.2±3.6<br><b>3 months</b><br>23.5±4.1<br><b>SRP+aPDT</b><br><b>Baseline</b><br>54.8±6.6<br><b>1 month</b><br>21.6±6.2<br><b>3 months</b><br>22.3±4.1 |
| De Melo Soares M et al. 2019 [21] | Generalized Chronic periodontitis<br><br>Interproximal periodontal pockets with PD and CAL ≥ 5 mm in contralateral teeth | <b>Test Group</b><br>SRP+aPDT<br><br><b>Group Control</b><br>SRP<br><br><b>Follow-up:</b><br>Baseline<br>30 and 90 days | Smokers ≥10 cigarettes per day at least 5 years | <b>Moderate pockets SRP+aPDT</b><br><b>Baseline</b><br>5.17±0.45<br><b>30 days</b><br>3.81 ± 0.85*<br><b>90 days</b><br>3.87±0.86*<br><b>SRP</b><br><b>Baseline</b><br>5.33±0.43<br><b>30 days</b><br>4.33 ±0.90*<br><b>90 days</b><br>4.13±1.09*<br><br><b>Deep pockets SRP+aPDT</b><br><b>Baseline</b><br>7.29±0.95<br><b>30 days</b><br>6.64± 1.49<br><b>90 days</b><br>5.14±1.06*<br><br><b>SRP</b><br><b>Baseline</b><br>7.27±0.43<br><b>30 days</b><br>6.17± 1.62<br><b>90 days</b><br>5.50±1.11 | <b>Moderate pockets SRP+aPDT</b><br><b>Baseline</b><br>5.25±0.59<br><b>30 days</b><br>4..41 ± 1.18*<br><b>90 days</b><br>4.40±1.16*<br><b>SRP</b><br><b>Baseline</b><br>5.34±0.95<br><b>30 days</b><br>4..47 ± 1.32<br><b>90 days</b><br>4.53±1.18<br><br><b>Deep pockets SRP+aPDT</b><br><b>Baseline</b><br>7.59± 1.02<br><b>30 days</b><br>6.64± 1.13<br><b>90 days</b><br>5.87± 1.31*<br><br><b>SRP</b><br><b>Baseline</b><br>7.47±0.67<br><b>30 days</b><br>5.92±1.53*<br><b>90 days</b><br>5.70±1.46* | <b>SRP+aPDT</b><br><b>Baseline</b><br>71.42<br><b>30 days</b><br>44.65<br><b>90 days</b><br>62<br><br><b>SRP</b><br><b>Baseline</b><br>65.45<br><b>30 days</b><br>31.18<br><b>90 days</b><br>53.06                                     | <b>SRP+aPDT</b><br><b>Baseline</b><br>67.85<br><b>30 days</b><br>33.92<br><b>90 days</b><br>34<br><br><b>SRP</b><br><b>Baseline</b><br>70.90<br><b>30 days</b><br>44.44<br><b>90 days</b><br>25                                        |

|                           |                                                                                                                                                                                                             |                                                                                                                                                |                                                         |                                                                                                                                                                                                                                                                                                           |                                                                                                                                                                                                                                                                                                             |                                                                                                                                                                                                                                                                                                                      |    |
|---------------------------|-------------------------------------------------------------------------------------------------------------------------------------------------------------------------------------------------------------|------------------------------------------------------------------------------------------------------------------------------------------------|---------------------------------------------------------|-----------------------------------------------------------------------------------------------------------------------------------------------------------------------------------------------------------------------------------------------------------------------------------------------------------|-------------------------------------------------------------------------------------------------------------------------------------------------------------------------------------------------------------------------------------------------------------------------------------------------------------|----------------------------------------------------------------------------------------------------------------------------------------------------------------------------------------------------------------------------------------------------------------------------------------------------------------------|----|
| Theodoro et al. 2018 [20] | Severe generalized chronic periodontitis<br><br>In at least 6 teeth, including one or several sites with PD $\geq$ 5 mm; CAL $\geq$ 5 mm; a minimum of 30% of the sites with PD and CAL $\geq$ 4 mm and BOP | <b>Group 1</b><br>SRP<br><b>Group 2</b><br>SRP + MTZ-AMX<br><b>Group 3</b><br>SRP + aPDT<br><br><b>Follow-up:</b><br>Baseline, 90 and 180 days | Smokers $\geq$ 10 cigarettes per day for $\geq$ 5 years | <b>Group 1</b><br><b>SRP</b><br><b>Baseline</b><br>4.19 $\pm$ 0.85<br><b>90 days</b><br>4.84 $\pm$ 0.62<br><b>180 days</b><br>3.85 $\pm$ 0.73<br><br><b>Group 3</b><br><b>SRP+aPDT</b><br><b>Baseline</b><br>4.02 $\pm$ 0.42<br><b>90 days</b><br>3.58 $\pm$ 0.36*<br><b>180 days</b><br>3.54 $\pm$ 0.33* | <b>Group 1</b><br><b>SRP</b><br><b>Baseline</b><br>4.68 $\pm$ 0.94<br><b>90 days</b><br>4.51 $\pm$ 0.80<br><b>180 days</b><br>4.47 $\pm$ 0.80†<br><br><b>Group 3</b><br><b>SRP+aPDT</b><br><b>Baseline</b><br>4.55 $\pm$ 0.39<br><b>90 days</b><br>4.12 $\pm$ 0.36*<br><b>180 days</b><br>4.11 $\pm$ 0.34*† | <b>Group 1</b><br><b>SRP</b><br><b>Baseline</b><br>76.48 $\pm$ 22.68<br><b>90 days</b><br>69.12 $\pm$ 19.44<br><b>180 days</b><br>68.89 $\pm$ 22.02<br><br><b>Group 3</b><br><b>SRP+aPDT</b><br><b>Baseline</b><br>87.88 $\pm$ 9.61<br><b>90 days</b><br>69.40 $\pm$ 13.08*<br><b>180 days</b><br>59.69 $\pm$ 17.97* | NA |
| Queiroz et al. 2015[27]   | Chronic periodontitis<br><br>Presenting bilaterally at least 2 sites with PD $\geq$ 5 mm; at least 20 teeth present                                                                                         | <b>Group Test</b><br>SRP+aPDT<br><br><b>Group Control</b><br>SRP<br><br><b>Follow-up:</b><br>Baseline, 4 weeks and 12 weeks                    | Smokers $\geq$ 10 cigarettes per day for $\geq$ 5 years | <b>SRP+aPDT</b><br><b>Baseline</b><br>5.39 $\pm$ 0.74<br><b>4 Weeks</b><br>3.52 $\pm$ 0.82*<br><b>12 weeks</b><br>3.58 $\pm$ 1.05*<br><br><b>SRP</b><br><b>Baseline</b><br>5.35 $\pm$ 0.70<br><b>4 Weeks</b><br>3.37 $\pm$ 0.98*<br><b>12 weeks</b><br>3.77 $\pm$ 1.06*                                   | <b>SRP+aPDT</b><br><b>Baseline</b><br>10.83 $\pm$ 1.45<br><b>4 Weeks</b><br>9.01 $\pm$ 1.70*<br><b>12 weeks</b><br>9.24 $\pm$ 1.91*<br><br><b>SRP</b><br><b>Baseline</b><br>11.12 $\pm$ 1.52<br><b>4 Weeks</b><br>9.28 $\pm$ 1.60*<br><b>12 weeks</b><br>9.72 $\pm$ 1.86*                                   | NA                                                                                                                                                                                                                                                                                                                   | NA |
| Queiroz et al. 2014 [28]  | Chronic periodontitis<br><br>Presenting bilaterally at least 2 sites with PD $\geq$ 5 mm; at least 20 teeth                                                                                                 | <b>Group Test</b><br>SRP+aPDT<br><b>Group Control</b><br>SRP                                                                                   | Smokers $\geq$ 10 cigarettes per day for $\geq$ 5 years | NA                                                                                                                                                                                                                                                                                                        | NA                                                                                                                                                                                                                                                                                                          | NA                                                                                                                                                                                                                                                                                                                   | NA |

|                             |                                                                                                                                    |                                                                                                                    |                                                 |                                                                                                                                                                       |                                                                                                                                                                       |                                                                                                                                                                             |                                                                                                                                                                           |
|-----------------------------|------------------------------------------------------------------------------------------------------------------------------------|--------------------------------------------------------------------------------------------------------------------|-------------------------------------------------|-----------------------------------------------------------------------------------------------------------------------------------------------------------------------|-----------------------------------------------------------------------------------------------------------------------------------------------------------------------|-----------------------------------------------------------------------------------------------------------------------------------------------------------------------------|---------------------------------------------------------------------------------------------------------------------------------------------------------------------------|
| Al-Zahrani et al. 2011 [29] | Generalized chronic periodontitis.<br><br>Marginal radiographic alveolar bone loss of >20% and CAL ≥ 3 mm at 30% or more of sites. | <b>Group Test</b><br>SRP+aPDT<br><br><b>Group Control</b><br>SRP<br><br><b>Follow-up:</b><br>Baseline and 3 months | Smokers ≥10 cigarettes per day for at ≥5 years. | <b>SRP+aPDT</b><br><b>Baseline</b><br>5.60±0.83<br><b>3 months</b><br>3.84±0.85*†<br><br><b>SRP</b><br><b>Baseline</b><br>5.35±0.46<br><b>3 months</b><br>3.90±0.75*† | <b>SRP+aPDT</b><br><b>Baseline</b><br>6.30±1.44<br><b>3 months</b><br>4.70±1.27*†<br><br><b>SRP</b><br><b>Baseline</b><br>6.18±1.40<br><b>3 months</b><br>4.80±1.45*† | <b>SRP+aPDT</b><br><b>Baseline</b><br>74.50±21.50<br><b>3 months</b><br>41.90±22.30*<br><br><b>SRP</b><br><b>Baseline</b><br>68.00±23.00<br><b>3 months</b><br>45.60±19.50* | <b>SRP+aPDT</b><br><b>Baseline</b><br>78.50±16.10<br><b>3 months</b><br>41.90±17.90<br><br><b>SRP</b><br><b>Baseline</b><br>75.90±15.80<br><b>3 months</b><br>43.60±16.60 |
|-----------------------------|------------------------------------------------------------------------------------------------------------------------------------|--------------------------------------------------------------------------------------------------------------------|-------------------------------------------------|-----------------------------------------------------------------------------------------------------------------------------------------------------------------------|-----------------------------------------------------------------------------------------------------------------------------------------------------------------------|-----------------------------------------------------------------------------------------------------------------------------------------------------------------------------|---------------------------------------------------------------------------------------------------------------------------------------------------------------------------|

PD, probing depth; CAL, clinical attachment level; NS, never smokers; CS, cigarette smokers; aPDT, antimicrobial photodynamic therapy; RSD, root surface debridement; DS, dental scaling; SRP, scaling root planing; \*Intra-group, difference from baseline,  $p < 0.05$ ; †Inter-group difference, significant differences between groups across same timeline ( $p < .05$ ); NA, not evaluated.
