# Supplementary material for: Benefits of Antimicrobial Photodynamic Therapy as an Adjunct to Non-Surgical Periodontal Treatment in Smokers with Periodontitis: A Systematic Review and Meta-Analysis
Source: MDPI journal article supplement (doi:10.3390/medicina59040684), 2023-03-30
Supplement: s1 [file s1]

Table S1. Characteristics of the studies

| Study and year of publication   | Country      | Study design                | sample size (baseline)                                                                                                                                                                           | Follow-up | Source of funding.                                                                                                                                                                                                                            |
|---------------------------------|--------------|-----------------------------|--------------------------------------------------------------------------------------------------------------------------------------------------------------------------------------------------|-----------|-----------------------------------------------------------------------------------------------------------------------------------------------------------------------------------------------------------------------------------------------|
| Al- Kheraif et al. 2022 [26]    | Saudi Arabia | RCT<br>Split mouth          | N=29 (23 male, 6 female)<br>14 Cigarette-smokers and 15 Non-smokers with Stage III Periodontitis<br>Mean age for cigarette smokers $42.2 \pm 3.8$ and<br>Mean age for non-smokers $40.5 \pm 2.6$ | 6 months  | Research Supporting Project number (RSP- 2021/31), King Saud University, Riyadh, Saudi Arabia.                                                                                                                                                |
| Al- Kheraif et al. 2022 [25]    | Saudi Arabia | RCT<br>Split mouth          | N=26 (23 male, 3 female)<br>13 Cigarette-smokers and 13 Non-smokers with Stage II Periodontitis<br>Mean age for cigarette smokers $45.2 \pm 4.8$ and<br>Mean age for non-smokers $43.5 \pm 3.6$  | 6 months  | Research Supporting Project number (RSP- 2021/31), King Saud University, Riyadh, Saudi Arabia.                                                                                                                                                |
| AlAhmari et al. 2019 [24]       | Saudi Arabia | RCT<br>Patients' assignment | N=83 (83 male)<br>42 Cigarette-smokers with CP and 41 Non-smokers with CP<br>Mean age for cigarette smokers $46.8 \pm 3.2$ and<br>Mean age for non-smokers $46.9 \pm 2.82$                       | 3 months  | Supported by International Scientific Partnership Program ISPP at King Saud University, Riyadh, Saudi Arabia ISPP#0075.                                                                                                                       |
| De Melo Soares et al. 2019 [21] | Brazil       | RCT<br>Split mouth          | N=22 (6 male, 16 female)<br>Age Range to 39- 61 years<br>Mean age of study $48 \pm 6.4$<br>only smoking patients                                                                                 | 90 days   | Funding The fiber tips and photosensitizers were donated by helbo (bredent medical GmbH & Co KG, Walldorf, Germany).                                                                                                                          |
| Theodoro et al. 2018 [20]       | Brazil       | RCT<br>Split mouth          | N=51(35 male, 16 female)<br>Age range to 30 – 70 years<br>Mean age of study $48 \pm 5$<br>only smoking patients                                                                                  | 180 days  | Supported in part by FAPESP (“Support Foundation of São Paulo Research” Process # 2013/05424-3) and the CNPq (National Counsel of Technological and Scientific Development – Process 302806/2012-1) and ProInter/UNESP (Process # 2016-1346). |
| Queiroz et al. 2015 [27]        | Brazil       | RCT<br>Split mouth          | N=20 (9 male, 11 female)<br>Age Range to 55 years<br>Mean age of study $46.05 \pm 6.38$<br>only smoking patients                                                                                 | 12 weeks  | Supported by grants from the São Paulo State Research Foundation (grant2009/15845-0)                                                                                                                                                          |
| Queiroz et al. 2014 [28]        | Brazil       | RCT<br>Split mouth          | N= 20(9 male, 11 female)<br>Age Range to 55 years<br>Mean age of study $46.05 \pm 6.38$<br>only smoking patients                                                                                 | 12 weeks  | Supported by grants from the São Paulo State Research Foundation (grant2009/15845-0)                                                                                                                                                          |
| Al-Zahrani et al. 2011 [29]     | Saudi Arabia | RCT<br>split-mouth          | N=20 (20 male, 0 female)<br>Age Range to 30- 56 years<br>Mean age of the study $41.6 \pm 9.6$<br>only smoking patients                                                                           | 3 months  | This study was supported by a grant from King Abdulaziz City for Science and Technology, Riyadh, Kingdom of Saudi Arabia (Grant No.LGP-14-32).                                                                                                |
