# Supplementary material for: Benefits of Antimicrobial Photodynamic Therapy as an Adjunct to Non-Surgical Periodontal Treatment in Smokers with Periodontitis: A Systematic Review and Meta-Analysis
Source: MDPI journal article supplement (doi:10.3390/medicina59040684), 2023-03-30
Supplement: s1 [file s1]

Table S5. Microbial complexes (%) and mean counts ( $\times 10^5$ ) of 40 bacterial species. Comparing the treatments groups (SRP and SRP +aPDT) at follow-up.

| Study                                                                         | Groups          | Microbial complexes (%)  |                                           |                                |                              |                   |                                        |
|-------------------------------------------------------------------------------|-----------------|--------------------------|-------------------------------------------|--------------------------------|------------------------------|-------------------|----------------------------------------|
|                                                                               |                 | Red color                | Orange color                              | Purple color                   | Yellow color                 | Blue color        | Green color                            |
| De Melo Soares et al. 2019 [21]                                               | <b>SRP+aPDT</b> | 18%                      | <b>34%†</b>                               | 15%                            | 5%                           | 10%               | 6%                                     |
|                                                                               | Baseline        |                          |                                           |                                |                              |                   |                                        |
|                                                                               | Follow up       | 13%                      | <b>43%†</b>                               | 8%                             | 6%                           | 12%               | 7%                                     |
|                                                                               | 0 day           | 5%                       | 40%                                       | 16%                            | 5%                           | 12%               | 10%                                    |
|                                                                               | 30 days         | 8%                       | 37%                                       | 12%                            | 5%                           | 12%               | <b>9%*</b>                             |
|                                                                               | 90 days         |                          |                                           |                                |                              |                   |                                        |
|                                                                               | <b>SRP</b>      | 16%                      | <b>41%†</b>                               | 12%                            | 5%                           | 10%               | 6%                                     |
|                                                                               | Baseline        |                          |                                           |                                |                              |                   |                                        |
|                                                                               | Follow up       | 8%                       | 42%                                       | 16%                            | 6%                           | 10%               | 8%                                     |
|                                                                               | 0 day           | <b>4%*</b>               | 34%                                       | 15%                            | 6%                           | 17%               | 9%                                     |
|                                                                               | 30 days         | 9%                       | 36%                                       | 15%                            | 6%                           | 12%               | 8%                                     |
|                                                                               | 90 days         |                          |                                           |                                |                              |                   |                                        |
| Mean counts ( $\times 10^5$ ) of 40 bacterial species for microbial complexes |                 |                          |                                           |                                |                              |                   |                                        |
| Queiroz et al. 2014 [28]                                                      | <b>SRP+aPDT</b> | <b>Red color</b>         | <b>Orange color</b>                       | <b>Purple color</b>            | <b>Yellow color</b>          | <b>Blue color</b> | <b>Green color</b>                     |
|                                                                               | Baseline        | <b>16.6</b>              | <b>5.52</b>                               | <b>4.85</b>                    | <b>2.88</b>                  |                   | <b>3.24</b>                            |
|                                                                               |                 | <i>T. forsythia</i> 7.21 | <i>C. gracilis</i> : 1.90                 | <i>A. odontolyticus</i> : 3.66 | <i>S. gordonii</i> : 3.88    |                   | <i>A. actinomycetemcomitans</i> : 2.05 |
|                                                                               |                 | <i>P. gingivalis</i> 40  | <i>C. rectus</i> : 2.86                   | <i>V. parvula</i> : 6.4        | <i>S. intermedius</i> : 2.29 |                   | <i>C. gingivalis</i> : 1.37            |
|                                                                               |                 | <i>T. denticola</i> 2.62 | <i>C. showae</i> : 3.80                   |                                | <i>S. mitis</i> : 2.29       |                   | <i>C. ochracea</i> : 4.34              |
|                                                                               |                 |                          | <i>E. nodatum</i> : 4.76                  |                                | <i>S. oralis</i> : 1.6       |                   | <i>C. sputigena</i> : 2.05             |
|                                                                               |                 |                          | <i>F. nucleatum</i> : 3.49                |                                | <i>S. sanguinis</i> : 4.34   |                   | <i>E. corrodens</i> : 6.4              |
|                                                                               |                 |                          | <i>F. nucleatum ss polymorphum</i> : 5.39 |                                |                              |                   |                                        |
|                                                                               |                 |                          | <i>F. nucleatum ss vicentii</i> : 20.63   |                                |                              |                   |                                        |
|                                                                               |                 |                          | <i>F. periodonticum</i> : 5.39            |                                |                              |                   |                                        |
|                                                                               |                 |                          | <i>P. micra</i> : 5.71                    |                                |                              |                   |                                        |
|                                                                               |                 |                          | <i>P. intermedia</i> : 4.76               |                                |                              |                   |                                        |

|  |                                              |                                                                                                                                                                            |                                                                                                                                                                                                                                                                                                                                                                                                                                                                                                                                                                                                                                                                                                            |                                                                                                                            |                                                                                                                                                                                                                                                           |                                                                                                                                                                                                                                                                                 |
|--|----------------------------------------------|----------------------------------------------------------------------------------------------------------------------------------------------------------------------------|------------------------------------------------------------------------------------------------------------------------------------------------------------------------------------------------------------------------------------------------------------------------------------------------------------------------------------------------------------------------------------------------------------------------------------------------------------------------------------------------------------------------------------------------------------------------------------------------------------------------------------------------------------------------------------------------------------|----------------------------------------------------------------------------------------------------------------------------|-----------------------------------------------------------------------------------------------------------------------------------------------------------------------------------------------------------------------------------------------------------|---------------------------------------------------------------------------------------------------------------------------------------------------------------------------------------------------------------------------------------------------------------------------------|
|  | Follow up<br>1 week/<br>4 weeks/<br>12 weeks | <b>16.8</b><br><b>16.41</b><br><b>17.73</b><br><i>T. forsythia</i> : 7.78/<br>7.78/ 11.4<br><i>P. gingivalis</i><br>40/40/40<br><i>T. denticola</i> : 2.62 /<br>1.47/ 1.80 | <i>P. nigrescens</i> : 4.76<br><i>S. constellatus</i> : 2.86<br><br><b>5.02</b><br><b>5.19</b><br><b>4.37</b><br><i>C. gracilis</i> :<br>2.52/ 2.10/ 1.43<br><i>C. rectus</i> :<br>2.54/ 1.66/ 1.12<br><i>C. showae</i> :<br>4.09/ 4.08/ 3.11<br><i>E. nodatum</i> :<br>4.99/ 9.71/ 3.89<br><i>F. nucleatum</i> :<br>2.27/ 3.92/ 3.0<br><i>F. nucleatum ss</i><br><i>polymorphum</i> :<br>4.81/ 4.8/ 4.8<br><i>F. nucleatum ss vicentii</i> :<br>15.46/ 16.33/ 15.24<br><i>F. periodonticum</i> : 5.29/<br>5.06/ 4.84<br><i>P. micra</i> :<br>5.85/ 3.99/ 4.75<br><i>P. intermedia</i> :<br>3.56/ 3.46/ 4.33<br><i>P. nigrescens</i> :<br>5.65/ 5.67/ 3.37<br><i>S. constellatus</i> :<br>3.22/ 1.58/ 2.62 | <b>5</b><br><b>9.1</b><br><b>4.17</b><br><i>A. odontolyticus</i><br>3.73/3.18/2.63<br><i>V. parvula</i><br>6.27/15.03/5.72 | <b>3.68</b><br><b>2.97</b><br><b>2.86</b><br><i>S. gordonii</i> :<br>5.72/4.86/4.02<br><i>S. intermedius</i> :<br>2.47/1.92/2.1<br><i>S. mitis</i> :<br>3.58/2.49/2.70<br><i>S. oralis</i> :<br>1.68/1.41/1.62<br><i>S. sanguinis</i> :<br>4.93/4.17/3.84 | <b>3.05</b><br><b>3.59</b><br><b>2.50</b><br><i>A. actinomycetemcomitans</i><br>1.80/1.28/0.90<br><i>C. gingivalis</i> :<br>1.46/1.13/0.60<br><i>C. ochracea</i> :<br>3.89/ 4.44/ 4.23<br><i>C. sputigena</i> :<br>2.05/ 1.72/1.50<br><i>E. corrodens</i> :<br>6.05/ 9.41/ 5.29 |
|  | SRP<br>Baseline                              | <b>17.48</b><br><i>T. forsythia</i> 9.83<br><i>P. gingivalis</i> 40<br><i>T. denticola</i> 2.62                                                                            | <b>6.16</b><br><i>C. gracilis</i> : 2.85<br><i>C. rectus</i> : 2.53<br><i>C. showae</i> : 4.12<br><i>E. nodatum</i> : 4.76<br><i>F. nucleatum</i> : 4.12                                                                                                                                                                                                                                                                                                                                                                                                                                                                                                                                                   | <b>5.03</b><br><i>A. odontolyticus</i> : 4.11<br><i>V. parvula</i> : 5.94                                                  | <b>3.83</b><br><i>S. gordonii</i> : 8.91<br><i>S. intermedius</i> : 2.7<br><i>S. mitis</i> : 2.51<br><i>S. oralis</i> : 1.6<br><i>S. sanguinis</i> : 3.42                                                                                                 | <b>3.20</b><br><i>A. actinomycetemcomitans</i> :<br>2.28<br><i>C. gingivalis</i> :1.6<br><i>C. ochracea</i> : 4.34<br><i>C. sputigena</i> : 2.06<br><i>E. corrodens</i> : 5.71                                                                                                  |

|  |                                              |                                              |                                                                                                                                                                                                                                                                                                                                                                                                                                                                                                                                                                                                                                                                                    |                                           |                                                                                                                                                                                                                         |                                                                                                                                                                                                                               |
|--|----------------------------------------------|----------------------------------------------|------------------------------------------------------------------------------------------------------------------------------------------------------------------------------------------------------------------------------------------------------------------------------------------------------------------------------------------------------------------------------------------------------------------------------------------------------------------------------------------------------------------------------------------------------------------------------------------------------------------------------------------------------------------------------------|-------------------------------------------|-------------------------------------------------------------------------------------------------------------------------------------------------------------------------------------------------------------------------|-------------------------------------------------------------------------------------------------------------------------------------------------------------------------------------------------------------------------------|
|  | Follow up<br>1 week/ 4<br>weeks/<br>12 weeks | <b>14.77</b><br><b>14.36</b><br><b>14.61</b> | <i>F. nucleatum ss polymorphum</i> :5.07<br><i>F. nucleatum ss vicentii</i> :<br>24.44<br><i>F. periodonticum</i> : 9.20<br><i>P. micra</i> : 5.07<br><i>P. intermedia</i> : 4.45<br><i>P. nigrescens</i> : 4.44<br><i>S. constellatus</i> : 2.85<br><br><i>T. forsythia</i> :<br>2.68/2.24/1.92<br><i>P. gingivalis</i> :<br>38.95/ 38.62/40<br><i>T. denticola</i> :<br>2.68/ 2.24/ 1.92<br><br><i>C. gracilis</i> :<br>2.50/ 2.50/ 2.18<br><i>C. rectus</i> :<br>2.50/ 2.18/ 1.96<br><i>C. showae</i> :<br>3.27/ 3.60/ 3.05<br><i>E. nodatum</i> :<br>5.78/ 5.45/ 5.46<br><i>F. nucleatum</i> :<br>3.32/ 3.79/ 2.72<br><i>F. nucleatum ss polymorphum</i> :<br>5.51/ 9.05/ 5.78 | <b>8.16</b><br><b>7.23</b><br><b>7.02</b> | <b>23.28</b><br><b>16.43</b><br><b>18.36</b>                                                                                                                                                                            | <b>17.19</b><br><b>15.91</b><br><b>15.33</b>                                                                                                                                                                                  |
|  |                                              |                                              | <i>A. odontolyticus</i> :<br>4.32/ 3.96/ 3.73<br><i>V. parvula</i> :<br>12/ 10.5/ 10.31                                                                                                                                                                                                                                                                                                                                                                                                                                                                                                                                                                                            |                                           | <i>S. gordonii</i> :<br>9.27/ 4.91/ 4.91<br><i>S. intermedius</i> :<br>2.73/ 2.35/ 2.56<br><i>S. mitis</i> :<br>3.84/ 2.83/ 3.20<br><i>S. oralis</i> :<br>2.35/ 1.85/ 2.06<br><i>S. sanguinis</i> :<br>5.09/ 4.49/ 5.63 | <i>A. actinomycetemcomitans</i> :<br>2.18 / 2.07/ 2.34<br><i>C. gingivalis</i> :1.88/ 1.60/ 1.08<br><i>C. ochracea</i> : 4.28/ 4.58/ 4.07<br><i>C. sputigena</i> : 2.51/ 1.81/ 2.12<br><i>E. corrodens</i> : 6.34/ 5.85/ 5.72 |

\*Intra-group difference with baseline,  $p < 0.05$ ; †Inter-group, significant difference between groups in the same period of analysis,  $p < 0.05$ .
