# Supplementary material for: Benefits of Antimicrobial Photodynamic Therapy as an Adjunct to Non-Surgical Periodontal Treatment in Smokers with Periodontitis: A Systematic Review and Meta-Analysis
Source: MDPI journal article supplement (doi:10.3390/medicina59040684), 2023-03-30
Supplement: s1 [file s1]

Table S2. Types and concentration of photosensitizers, time of photosensitizer, Laser type, parameters and configurations of laser (wavelength, energy fluence, power output, power density, optic fiber diameter), Administration of aPDT (time and the number of applications).

| <i>Study and year of publication</i> | <i>Types and Concentration of photosensitizer</i>                                                                                                                                                                                                                      | <i>Time of photosensitizer</i> | <i>Laser type</i>                                | <i>Parameters and configurations of laser</i> |                                          |                          |                                          |                                  | <i>Administration of aPDT (time/number of applications)</i> |
|--------------------------------------|------------------------------------------------------------------------------------------------------------------------------------------------------------------------------------------------------------------------------------------------------------------------|--------------------------------|--------------------------------------------------|-----------------------------------------------|------------------------------------------|--------------------------|------------------------------------------|----------------------------------|-------------------------------------------------------------|
|                                      |                                                                                                                                                                                                                                                                        |                                |                                                  | <i>Laser Wavelength (nm)</i>                  | <i>Energy Fluence (J/cm<sup>2</sup>)</i> | <i>Power Output (mW)</i> | <i>Power density (mW/cm<sup>2</sup>)</i> | <i>Optic Fiber Diameter (mm)</i> |                                                             |
| Al- Kheraif et al. 2022 [26]         | Chloro- Aluminum Phthalocyanine (CAP)<br>Topical application of CAP (25mg/ml) in conjunction with Gel-based delivery drug (1.5 mg/ml).<br>This drug consisted of 23% (w/w) poloxamer 407 and Polyetenoglicols (PEG 400) in a buffer solution pH -7.4                   | 5 min                          | Diode laser (Thera Lase-DMC, São Carlos, Brazil) | 685nm                                         | 3 J/cm <sup>2</sup>                      | 29mW                     | NR                                       | NR                               | NR/ 1 application (immediately)                             |
| Al- Kheraif et al. 2022 [25]         | Chloro- Aluminum Phthalocyanine (CAP)<br>Topical application of CAP (30mg/ml) in conjunction with Gel-based delivery drug (1.5 mg/ml).<br><br>This drug consisted consisting of 23% (w/w) poloxamer 407 and Polyetenoglicols (PEG 400) in a buffer solution (pH = 7.4) | 5 min                          | InGaAlP (Thera Lase- DMC)                        | 685 nm                                        | 2.5 J/cm <sup>2</sup>                    | 35mW                     | NR                                       | NR                               | NR/ 2 application (immediately, 3 days)                     |

|                                 |                                                                                    |       |                                                             |        |             |       |          |        |                                                      |
|---------------------------------|------------------------------------------------------------------------------------|-------|-------------------------------------------------------------|--------|-------------|-------|----------|--------|------------------------------------------------------|
| AlAhmari et al. 2019 [24]       | Methylene blue 0.005%                                                              | 10s   | Diode-Laser                                                 | 660nm  | NR          | 150mW | 75mW/cm2 | 0.6 mm | 60s/ application (immediately)                       |
| De Melo Soares et al. 2019 [21] | Phenothiazine Chloride 100 µg/ml (HELBO Blue Photosensitizer)                      | 1 min | Diode-Laser (Helbo Photodynamic Sys., Walldorf, Germany)    | 660nm  | 16.72 J/cm2 | 70mW  | 28mW/cm2 | 0.6 mm | 60s/ 4 applications (immediately, 2, 7, and 14 days) |
| Theodoro et al. 2018 [20]       | Methylene blue 10 mg/ml (Aphoticário Manipulation Pharmacy, Araçatuba, SP, Brazil) | 1min  | GaAlAs (Laser Duo, MM Optics, Ltda, São Carlos, SP, Brazil) | 660 nm | 160 J/cm2   | 100mW | NA       | 0.03   | 48s/ 3 applications (immediately, 48h and 96h)       |
| Queiroz et al. 2015 [27]        | Phenothiazine Chloride 100 µg/ml (HELBO Blue Photosensitizer)                      | 1min  | Diode-Laser (Helbo Photodynamic Sys., Walldorf, Germany)    | 660 nm | 16.72 J/cm2 | 60mW  | 28mW/cm2 | 0.6 mm | 60s/ 1 application (immediately)                     |
| Queiroz et al. 2014 [28]        | Phenothiazine Chloride 100 µg/ml (HELBO Blue Photosensitizer)                      | 1min  | Diode-Laser (HelboPhotodynamic Sys., Walldorf, Germany)     | 660 nm | 16.72 J/cm2 | 60mW  | 28mW/cm2 | 0.6 mm | 60s/ 1aplication (immediately)                       |
| Al-Zahrani et al. 2011 [29]     | Methylene blue 0.01% (Ondine's Periowave, Ondine Biopharma Corp., Vancouver, BC).  | NA    | Diode-Laser                                                 | 670nm  | NR          | NR    | NR       | NR     | NR                                                   |

NR, not reported; µg/ml, microgram/milliliter; mg/ml, milligram/milliliter; nm, nanometer; J/cm2, Joule/square centimeter; mW, milliwatts; mW/cm2, millwatt/square centimeter; s, seconds.
