# Supplementary material for: Benefits of Antimicrobial Photodynamic Therapy as an Adjunct to Non-Surgical Periodontal Treatment in Smokers with Periodontitis: A Systematic Review and Meta-Analysis
Source: MDPI journal article supplement (doi:10.3390/medicina59040684), 2023-03-30
Supplement: s1 [file s1]

Table S4. Mean and standard deviation of the anaerobic microbiota of the subgingival plaque, of the species selected by the included studies.

| Study                         | Groups            | <i>Porphyromonas gingivalis</i> (Pg) | <i>Tannerella forsythia</i> (Tf) | <i>Prevotella intermedia</i> (Pi) | <i>Prevotella nigrescens</i> (Pn) |
|-------------------------------|-------------------|--------------------------------------|----------------------------------|-----------------------------------|-----------------------------------|
|                               |                   | Mean± SD of copy number              | Mean± SD of copy number          | Mean± SD of copy number           | Mean± SD of copy number           |
| Al- Kheraif et al. 2022 [26]  | <b>Group NS</b>   | <b>Group NS</b>                      | <b>Group NS</b>                  |                                   |                                   |
|                               | <b>PDT+ SRP</b>   | <b>aPDT+ SRP</b>                     | <b>aPDT+ SRP</b>                 |                                   |                                   |
|                               | Baseline          | 1.980.08±111.52‡                     | 1.932.29±130‡                    |                                   |                                   |
|                               | Follow up         | 334.66±27.89*                        | 281.25±46.87*                    |                                   |                                   |
|                               | 3 months          | 1.366.53±111.56                      | 687.5± 67.7*                     |                                   |                                   |
|                               | 6 months          |                                      |                                  |                                   |                                   |
|                               | <b>Difference</b> | <b>1.645.42</b>                      | <b>1.651.04</b>                  |                                   |                                   |
|                               | 3 months          | 613.55                               | <b>1.245.29</b>                  |                                   |                                   |
|                               | 6 months          |                                      |                                  |                                   |                                   |
|                               | <b>SRP</b>        | <b>SRP</b>                           | <b>SRP</b>                       |                                   |                                   |
|                               | Baseline          | 1.590.7± 111.63‡                     | 2.234.47 ± 139.53‡               |                                   |                                   |
|                               | Follow up         | 530.23±55.80*                        | 747.93±54.07*                    |                                   |                                   |
|                               | 3 months          | 2.065.12±139.53                      | 918.39±85.3*                     |                                   |                                   |
|                               | 6 months          |                                      |                                  |                                   |                                   |
|                               | <b>Difference</b> | <b>1.060.5</b>                       | <b>1.487.0</b>                   |                                   |                                   |
|                               | 3 months          | -474.3                               | <b>1.316.1</b>                   |                                   |                                   |
|                               | 6 months          |                                      |                                  |                                   |                                   |
| Al- Kheraif et al., 2022 [25] | <b>Group CS</b>   | <b>Group CS</b>                      | <b>Group CS</b>                  |                                   |                                   |
|                               | <b>PDT+ SRP</b>   | <b>aPDT+ SRP</b>                     | <b>aPDT+ SRP</b>                 |                                   |                                   |
|                               | Baseline          | 6.203.36±332.17‡                     | 9.510.42 ±984‡                   |                                   |                                   |
|                               | Follow up         | 575.67±57.92*                        | 328.13±78*†                      |                                   |                                   |
|                               | 3 months          | 2.746.29±139.75*†                    | 1.046.88±130.2*                  |                                   |                                   |
|                               | 6 months          |                                      |                                  |                                   |                                   |
|                               | <b>Difference</b> | <b>5.627.35</b>                      | <b>9.182</b>                     |                                   |                                   |
|                               | 3 months          | <b>3.457</b>                         | <b>8.464</b>                     |                                   |                                   |
|                               | 6 months          |                                      |                                  |                                   |                                   |
|                               | <b>SRP</b>        | <b>SRP</b>                           | <b>SRP</b>                       |                                   |                                   |
|                               | Baseline          | 5.060.81±1.030.66‡                   | 10.235.7±1.025‡                  |                                   |                                   |
|                               | Follow up         | 776.82±178.13*                       | 938.60±128*†                     |                                   |                                   |
|                               | 3 months          | 4.099.96±827.04†                     | 1.946.35±212.38*                 |                                   |                                   |
|                               | 6 months          |                                      |                                  |                                   |                                   |
|                               | <b>Difference</b> | <b>4.283.18</b>                      | <b>9.296.4</b>                   |                                   |                                   |
|                               | 3 months          | 961                                  | <b>8.288.65</b>                  |                                   |                                   |
|                               | 6 months          |                                      |                                  |                                   |                                   |
| Al- Kheraif et al., 2022 [25] | <b>Group NS</b>   | <b>Group NS</b>                      | <b>Group NS</b>                  | NA                                | NA                                |
|                               | <b>PDT+ DS</b>    | <b>PDT+ DS</b>                       | <b>PDT+ DS</b>                   |                                   |                                   |
|                               | Baseline          | 1.821.47 ± 85‡                       | 1.760.61 ± 114.92‡               |                                   |                                   |
|                               | <b>Follow up</b>  | <b>160.81 ± 19.22*</b>               | <b>108.79± 67.89*</b>            |                                   |                                   |
|                               | 3 months          | 1.202.78 ± 78.03‡                    | 540.69 ± 57.44                   |                                   |                                   |
|                               | 6 months          |                                      |                                  |                                   |                                   |
|                               | <b>Difference</b> | <b>1.661.97</b>                      | <b>1.651.82</b>                  |                                   |                                   |
|                               | 3 months          | 618.69                               | 1.219.92                         |                                   |                                   |
|                               | 6 months          |                                      |                                  |                                   |                                   |
|                               | <b>DS</b>         | <b>DS</b>                            | <b>DS</b>                        |                                   |                                   |
|                               | Baseline          | 1.504.61 ± 97.74‡                    | 1.963.9±164.65‡                  |                                   |                                   |
|                               | Follow up         | 457.84 ± 29.62*                      | 453.68±111.9*                    |                                   |                                   |
|                               | 3 months          | 2.010.39± 124.32‡                    | 692.27± 92.67‡                   |                                   |                                   |
|                               | 6 months          |                                      |                                  |                                   |                                   |
|                               | <b>Difference</b> | <b>1.046.77</b>                      | <b>1509.32</b>                   |                                   |                                   |
|                               | 3 months          | -505.78                              | 1.270.73                         |                                   |                                   |

|                          |                                                                                                                                                                                                                                                                                                                                                                                                                                                                        |                                                                                                                                                                                                                                                                                                                                                                                                                 |                                                                                                                                                                                                                                                          |                                                                                                                                                                                                                                                                                                                                                                            |                                                                                                                                                                                                                                                                                                                                                                                                       |
|--------------------------|------------------------------------------------------------------------------------------------------------------------------------------------------------------------------------------------------------------------------------------------------------------------------------------------------------------------------------------------------------------------------------------------------------------------------------------------------------------------|-----------------------------------------------------------------------------------------------------------------------------------------------------------------------------------------------------------------------------------------------------------------------------------------------------------------------------------------------------------------------------------------------------------------|----------------------------------------------------------------------------------------------------------------------------------------------------------------------------------------------------------------------------------------------------------|----------------------------------------------------------------------------------------------------------------------------------------------------------------------------------------------------------------------------------------------------------------------------------------------------------------------------------------------------------------------------|-------------------------------------------------------------------------------------------------------------------------------------------------------------------------------------------------------------------------------------------------------------------------------------------------------------------------------------------------------------------------------------------------------|
|                          | 6 months<br><b>Group CS<br/>PDT+ DS</b><br>Baseline<br>Follow up<br>3 months<br>6 months<br>Difference<br>3 months<br>6 months<br><b>DS</b><br>Baseline<br>Follow up<br>3 months<br>6 months<br>Difference<br>3 months<br>6 months                                                                                                                                                                                                                                     | <b>Group CS<br/>PDT+ DS</b><br>6.015.63 ± 300.37‡<br><b>314.35 ± 33.29*</b> †<br>2.497.26±142.23‡<br><br><b>5.701.28</b><br>3.518.37<br><br><b>DS</b><br>4.999.35±1.021.35‡<br><b>713.97±145.06*</b> †<br>4.027.87±796.35‡<br><br><b>4.285.38</b><br>971.48                                                                                                                                                     | <b>Group CS<br/>PDT+ DS</b><br>9.459.68 ± 940‡<br><b>141.48± 83.56*</b><br><b>897.14 ± 104.58†</b><br><br><b>9.408.2</b><br><b>8.562</b><br><br><b>DS</b><br>10.257.2±1.072.1‡<br>748.31±142.41*<br>1.771.57±182.3‡†<br><br><b>9.509</b><br><b>8.486</b> |                                                                                                                                                                                                                                                                                                                                                                            |                                                                                                                                                                                                                                                                                                                                                                                                       |
|                          |                                                                                                                                                                                                                                                                                                                                                                                                                                                                        | Mean± SD (ng/mL)                                                                                                                                                                                                                                                                                                                                                                                                |                                                                                                                                                                                                                                                          | Mean± SD (ng/mL)                                                                                                                                                                                                                                                                                                                                                           | Mean± SD (ng/mL)                                                                                                                                                                                                                                                                                                                                                                                      |
| Theodoro et al.2018 [20] | <b>Group 1<br/>SRP</b><br>Baseline<br>Follow up<br>90 days<br>180 days<br>Difference<br>90 days<br>180 days<br><b>Group 3<br/>SRP + aPDT</b><br>Baseline<br>Follow up<br>90 days<br>180 days<br>Difference<br>90 days<br>180 days<br><b>Group 1<br/>SRP</b><br>Baseline<br>Follow up<br>90 days<br>180 days<br>Difference<br>90 days<br>180 days<br><b>Group 3<br/>SRP + aPDT</b><br>Baseline<br>Follow up<br>90 days<br>180 days<br>Difference<br>90 days<br>180 days | <b>Group 1<br/>Moderate pockets<br/>SRP</b><br>1.21 ± 2.13<br>4.97 ± 17.92<br>0.45±1.68<br><br>-3.76<br>0.76<br><b>Group 3<br/>SRP + aPDT</b><br>1.13 ± 2.40<br>0.97 ± 1.74<br>1.20 ± 2.13<br><br>0.16<br>-0.07<br><br><b>Deep pockets<br/>SRP</b><br>0.88 ± 1.35<br>0.45 ± 0.79<br>1.08 ± 2.36<br><br>0.43<br>-0.2<br><br><b>SRP + aPDT</b><br>1.33 ± 5.15<br>2.51 ± 5.85<br>2.79 ± 6.20<br><br>-1.18<br>-1.46 | NA                                                                                                                                                                                                                                                       | <b>Group 1<br/>Moderate pockets<br/>SRP</b><br>0.31± 1.12<br>0<br>0<br><br>0.31<br>0.31<br><b>Group 3<br/>SRP + aPDT</b><br>0.17 ± 0.39<br>0.02 ± 0.04<br>1.58 ± 5.77<br><br>0.15<br>-1.41<br><br><b>Deep pockets<br/>SRP</b><br>0<br>0.02 ± 0.07<br>0.<br><br>-0.02<br>0.0<br><br><b>SRP + aPDT</b><br><b>0</b><br>0.01± 0.04<br><b>0.07 ± 0.12*</b><br><br>0.01<br>-0.07 | <b>Group 1<br/>Moderate pockets<br/>SRP</b><br>0.33± 0.86<br>0.12 ± 0.37<br>0.02 ± 0.04<br><br>0.21<br>0.31<br><b>Group 3<br/>SRP + aPDT</b><br>1.79± 6.89<br>0.01± 0<br><b>0*†</b><br><br>1.78<br>1.79<br><br><b>Deep pockets<br/>SRP</b><br>0.03± 0.07<br>0.07 ± 0.26<br>0<br><br>-0.04<br>0.03<br><br><b>SRP + aPDT</b><br>0.05 ± 0.12<br><b>0*</b><br><b>0*</b><br><br>0.05 ± 0.12<br>0.05 ± 0.12 |

NA, not evaluated; NR, not reported; \*Intra-group, difference with baseline,  $p < 0.05$ ; † Inter-group, indicates significant difference between test group (PDT+ SRP) and control group (SRP) across same timeline; ‡ Indicates significant difference between smokers and Never smokers.
