# Supplementary material for: Benefits of Antimicrobial Photodynamic Therapy as an Adjunct to Non-Surgical Periodontal Treatment in Smokers with Periodontitis: A Systematic Review and Meta-Analysis
Source: MDPI journal article supplement (doi:10.3390/medicina59040684), 2023-03-30
Supplement: s1 [file s1]

Table S6. Summary of assessment of quality and risk of bias (low +/high - /? unclear) in selected studies

| Study                           | Random sequence generation | Allocation concealment | Blinding subject | Blinding operator | Blinding examiner | Attrition bias | Selective reporting | Sample size calculation | Overall risk of bias | JADAD score |
|---------------------------------|----------------------------|------------------------|------------------|-------------------|-------------------|----------------|---------------------|-------------------------|----------------------|-------------|
| Al- Kheraif et al. 2022 [26]    | +                          | +                      | +                | ?                 | +                 | +              | +                   | +                       | ?                    | 4           |
| Al- Kheraif et al. 2022 [25]    | +                          | +                      | +                | ?                 | +                 | +              | +                   | +                       | ?                    | 4           |
| AlAhmari et al. 2019 [24]       | +                          | -                      | -                | -                 | -                 | +              | +                   | ?                       | -                    | 2           |
| De Melo Soares et al. 2019 [21] | +                          | +                      | +                | +                 | +                 | +              | +                   | +                       | +                    | 5           |
| Theodoro et al. 2018 [20]       | +                          | +                      | +                | +                 | +                 | +              | +                   | +                       | +                    | 5           |
| Queiroz et al. 2015 [27]        | +                          | -                      | -                | -                 | -                 | +              | +                   | +                       | -                    | 2           |
| Queiroz et al. 2014 [28]        | +                          | -                      | -                | -                 | -                 | +              | +                   | +                       | -                    | 2           |
| Al-Zahrani et al. 2020 [24]     | +                          | -                      | ?                | ?                 | ?                 | +              | +                   | +                       | -                    | 2           |
